1 **No impact of sex on surgical site infections in abdominal**  
2 **surgery: A multi-center study**

3

4 **No impact of sex on SSI in abdominal surgery**

5

6 Simone Nora Zwicky<sup>1¶</sup>, Severin Gloor<sup>1¶</sup>, Franziska Tschan<sup>2</sup>,  
7 Daniel Candinas<sup>1</sup>, Nicolas Demartines<sup>3</sup>, Markus Weber<sup>4</sup>, Guido  
8 Beldi<sup>1\*</sup>

9

10 <sup>1</sup>Department of Visceral Surgery and Medicine, University  
11 Hospital Bern, University of Bern, Bern, Switzerland

12 <sup>2</sup>Institute for Work and Organizational Psychology, University  
13 of Neuchâtel, Neuchâtel, Switzerland

14 <sup>3</sup>Department of Visceral Surgery, University Hospital  
15 Lausanne (CHUV), Lausanne, Switzerland

16 <sup>4</sup>Department of Surgery, Triemli Hospital, Zurich, Switzerland

17

NOTE: This preprint reports new research that has not been certified by peer review and should not be used to guide clinical practice.

18 \*Corresponding author (also for requests of reprint):

19 E-mail: [guido.beldi@insel.ch](mailto:guido.beldi@insel.ch)

20

21 ¶ These authors contributed equally to this work.

## 22 **Abstract**

23 *Objective:* Male sex is controversially discussed as a risk factor  
24 for surgical site infections (SSI). The aim of the present study  
25 was to evaluate the impact of sex on SSI in abdominal surgery  
26 under elimination of relevant confounders.

27 *Methods:* Clinicopathological data of 6603 patients undergoing  
28 abdominal surgery from a multi-center prospective database of  
29 four Swiss hospitals including patients between 2015 and 2018  
30 were assessed. Patients were stratified according to  
31 postoperative SSI and risk factors for SSI were assessed using  
32 univariate and multivariate analysis.

33 *Results:* In 649 of 6603 patients SSI was reported (9.8%). SSI  
34 was significantly associated with reoperation (22.7% vs. 3.4%,  
35  $p < 0.001$ ), higher mortality rate (4.6% vs. 0.9%,  $p < 0.001$ ) and  
36 higher rate of length of hospital stay over the 75<sup>th</sup> percentile  
37 (57.0 % vs. 17.9 %,  $p < 0.001$ ). In univariate analysis male sex  
38 was a significant risk factor for SSI ( $p = 0.01$ ). In multivariate

39 analysis including multiple confounders' such as comorbidities  
40 and perioperative factors there was no association between  
41 male sex and risk of SSI (odds ratio (OR) 1.1 [CI 0.8 – 1.4]).  
42 Independent risk factors for SSI in multivariate analysis were  
43 BMI  $\geq$  30 kg/m<sup>2</sup> (OR 1.8 [CI 1.3 - 2.3]), duration of surgery >  
44 75<sup>th</sup> percentile (OR 2.3 [1.8 - 2.9]), high contamination level  
45 (OR 1.3 [1.0 – 1.6]), laparotomy (OR 1.3 [1.0 – 1.7]), previous  
46 laparotomy (OR 1.4 [1.1 – 1.7]), blood transfusion (OR 1.7 [1.2  
47 – 2.4]), cancer (OR 1.3 [1.0-1.8], malnutrition (OR 2.5 [1.8 –  
48 3.4]).

49 *Conclusion:* Under elimination of relevant confounders there is  
50 no significant correlation between sex and risk of SSI after  
51 abdominal surgery.

52

53

## 54 **Introduction**

55 Surgical site infections (SSI) rank among the three most  
56 frequent healthcare-associated infections in Europe. [1] They  
57 account for more than one fifth of all healthcare-associated  
58 infections with reported incidence of up to 10% and impose a  
59 substantial burden to both, health-care systems and patients. [1-  
60 6] In the past, multiple patient- and surgery-related factors  
61 contributing to the development of SSI were identified  
62 including age, body mass index (BMI) and duration of surgery.  
63 [6-10]

64 Recently, sex was intensively discussed as possible risk  
65 factor for SSI as several studies reported increased SSI rates for  
66 men. [11-15] For instance two high volume studies analysing  
67 data from German Nosocomial Infections Surveillance reported  
68 significantly higher incidence of SSI among men in different  
69 procedures including abdominal surgery. [11, 12] However,  
70 one study was not unadjusted for any confounders [11] and in

71 the other important potential confounders as comorbidities  
72 including obesity and malnutrition could not be included into  
73 the analysis. [12]

74 Most other studies display unadjusted results or omit some  
75 important potential confounders as patient's age, ASA score,  
76 obesity, malnutrition, grade of wound contamination, duration  
77 of surgery and surgical approach (e.g. laparotomy). [11-15]  
78 Therefore it remains unclear if male sex represents a risk factor  
79 for developing SSI after abdominal surgery.

80 The identification of sex as risk factor for SSI would be  
81 important to allow the generation of sex-specific infection  
82 control practices in the future. The aim of the present study is  
83 to evaluate the impact of sex on surgical site infections after  
84 abdominal surgery under elimination of possible confounders.

85

## 86 **Methods**

### 87 **Trial design, patients, study interventions and data collection**

88       The study was designed as a multi-center, retrospective  
89 analysis of an existing prospective collected database. This  
90 database was created in the context of a prospective trial that  
91 assessed the effects of structured intraoperative briefings on  
92 patient outcomes including SSI. [16] The database includes  
93 data from patients undergoing surgery in four Swiss hospitals  
94 (2 university hospitals, and two non-university referral centres)  
95 between May 2015 and March 2018. The database was initiated  
96 after obtaining approval from the respective local ethical  
97 committees (leading committee: Kantonale Ethikkommission  
98 Bern #161/2014). Written general consent was obtained from  
99 individuals of three centers, in the fourth center the local ethical  
100 committee allowed explicitly the inclusion of patients who did  
101 not refuse the use of their data. All patients with an indication  
102 for elective or emergency abdominal surgery in the

103 participating hospitals were included and entered into an  
104 electronic database. Clinicopathological data of 6603 patients  
105 including demographics, therapeutic features, surgical  
106 procedures and complications as SSI were extracted. For the  
107 final analysis 82 patients with death within 30 days after  
108 surgery were excluded. All surgical treatments were performed  
109 by board-certified surgeons. Patients received in-hospital  
110 disease surveillance and therapy according to institutional  
111 standards and international guidelines. Exclusion criteria were  
112 patient age <18 years, preexisting SSI, previous surgery at the  
113 same surgical site within the past 30 days, procedures without  
114 general anaesthesia and proctological operations. Further  
115 patients with American Society of Anesthesiologists (ASA) -  
116 score  $\geq 5$  were excluded. [17]

117

118

119



## 120 **Study endpoints**

121       The primary endpoint of this study was defined as SSI  
122 within 30 days after surgery according to the Center for Disease  
123 Control and Prevention criteria. [18] Trained study nurses  
124 evaluated SSIs in accordance with the Swissnosso SSI  
125 surveillance system guide. [19] This guide adheres to the US  
126 National Healthcare Safety Network (former National  
127 Nosocomial Infection Surveillance, NNIS) standards and  
128 includes follow-up interviews by telephone 30 days after  
129 surgery. [18, 20] One center entered their perioperative data to  
130 the Enhanced Recovery After Surgery Interactive Audit System  
131 (ERAS; Encare, Stockholm, Sweden) and SSI were evaluated  
132 based on this validated data set. [21]

133

## 134 **Statistical analysis**

135       Quantitative and qualitative variables were expressed as  
136 mean (standard deviation) and frequency (percentage). For all

137 outcomes, the two groups were compared with the Fisher exact  
138 test or Kruksal-Wallis test for categorical variables and the  
139 Mann-Whitney U test for continuous variables, as appropriate.  
140 All  $p$ -values are considered statistically significant if  $p < 0.05$ .  
141 Univariate analysis was applied for patient- and surgery-  
142 specific covariates to identify statistically significant  
143 association with the occurrence of SSI. Co-variates with  
144 statistically significant differences were considered as possible  
145 confounders for development of SSI. All confounders were  
146 eliminated with backward selection ( $p$ -value  $< 0.05$ ). Statistical  
147 analysis was performed using SPSS version® 25 (IBM,  
148 Armonk, New York, USA).

149

## 150           **Results**

151           A total of 6603 patients undergoing abdominal surgery  
152           between May 2015 and March 2018 were analysed. Mean age  
153           and BMI were significantly increased in the SSI group (62.0 vs  
154           56.6 years,  $p < 0.001$ ; 27.5 vs 26.9 kg/m<sup>2</sup>,  $p = 0.010$ ). Patient  
155           demographics and surgical characteristics are displayed in  
156           Table 1. Of the 6603 surgical interventions, 24.8% were  
157           colorectal operations (including small-bowel surgeries), 21.4%  
158           hernia repairs, 16% cholecystectomies, 11.0% hepato-  
159           pancreato-biliary surgery, 10.% appendectomies, 8.2%  
160           bariatric interventions, 5.6% upper-GI operations and 3.0%  
161           renal and adrenal surgery. Mean duration of surgery (203.9 vs.  
162           121.5 min,  $p < 0.001$ ), National Nosocomial Infections  
163           Surveillance (NNIS) index (1.24 vs. 0.7,  $p < 0.001$ ) and ASA  
164           (2.6 vs. 2.2,  $p < 0.001$ ) score were significantly higher in the SSI  
165           group. [22] SSI correlated significantly with increased rates of  
166           long LOS >75<sup>th</sup> percentile (57.0 vs 17.9%,  $p < 0.001$ ),

167 reoperations (22.7 vs 3.4%,  $p < 0.001$ ) and mortality (4.6 vs  
168 0.9%,  $p < 0.001$ ). In 649 of 6521 included patients SSI was  
169 identified (9.8%). Univariate and multivariate analysis of  
170 patient and procedure dependent risk factors for SSI are shown  
171 in Table 2.

172 In univariate analysis male sex was a significant risk factor  
173 for SSI ( $p = 0.010$ ). Further patient dependent risk factors were  
174 age higher 65 years ( $p < 0.001$ ), BMI higher than 30 kg/m<sup>2</sup> ( $p =$   
175  $0.004$ ), cancer ( $p < 0.001$ ), diabetes ( $p = 0.009$ ), chemotherapy  
176 ( $p = 0.001$ ), alcohol abuse ( $p < 0.001$ ) and malnutrition ( $p$   
177  $< 0.001$ ). Perioperative factors with significant correlation to  
178 SSI were open approach by laparotomy ( $p < 0.001$ ), previous  
179 laparotomy ( $p < 0.001$ ), type of surgical procedure ( $p = 0.002$ ),  
180 blood transfusion ( $p < 0.001$ ) as well as all subsets of the NNIS  
181 score (duration > 75<sup>th</sup> percentile, contamination level  $\geq 3$  ASA  
182 grade  $\geq 3$ ,  $p < 0.001$ ). In multivariate analysis no association  
183 between male sex and risk of SSI (OR 1.1 [CI 0.8 – 1.4]) was

184 seen. Figure 1 displays multivariate analysis, where BMI  $\geq$  30  
 185 kg/m<sup>2</sup> (OR 1.8 [CI 1.3 - 2.3]), cancer (OR 1.3 [1.0-1.8]),  
 186 malnutrition (OR 2.5 [1.8 – 3.4]), duration of surgery > 75<sup>th</sup>  
 187 percentile (OR 2.3 [1.8 - 2.9]), contamination level  $\geq$ 3 (OR 1.3  
 188 [1.0 – 1.6]), laparotomy (OR 1.3 [1.0 – 1.7]), pervious  
 189 laparotomy (OR 1.4 [1.1 – 1.7]) and blood transfusion (OR 1.7  
 190 [1.2 – 2.4]) were persistent independent risk factors for SSI.

191

192 **Table 1.** Patient demographic and surgical characteristics.  
 193

| Variable                                  | SSI<br>(n=649) | No SSI<br>(n=5954) | <i>p-value</i> |
|-------------------------------------------|----------------|--------------------|----------------|
| Age, years, mean years (SD)               | 62.0 (14.9)    | 56.6 (17.5)        | <0.001         |
| BMI, mean kg/m <sup>2</sup> (SD)          | 27.5 (6.9)     | 26.9 (6.5)         | 0.011          |
| Male sex, n (%)                           | 399 (61.5)     | 3367 (56.6)        | 0.016          |
| ASA Score, mean (SD)                      | 2.6 (0.7)      | 2.2 (0.7)          | <0.001         |
| NNIS index, mean (SD)                     | 1.24 (0.88)    | 0.77 (0.80)        | <0.001         |
| Duration of surgery, mean<br>minutes (SD) | 203.97 (114.2) | 121.55 (88.7)      | <0.001         |
| Type of surgery, n (%)                    |                |                    | 0.002*         |
| Colorectal                                | 292 (45.0)     | 1346 (22.6)        |                |
| Hepato-Pancreato-Biliary                  | 137 (21.1)     | 592 (9.9)          |                |
| Renal and Adrenal                         | 6 (0.9)        | 192 (3.2)          |                |

|                         |            |             |        |
|-------------------------|------------|-------------|--------|
| Appendectomy            | 23 (3.5)   | 638 (10.7)  |        |
| Cholecystectomy         | 48 (7.4)   | 1009 (16.9) |        |
| Hernia                  | 43 (6.6)   | 1368 (23.0) |        |
| Bariatric               | 39 (6.0)   | 503 (8.4)   |        |
| Upper GI                | 61 (9.4)   | 306 (5.1)   |        |
| LOS (>75%), n (%)       | 369 (57.0) | 1063 (17.9) | <0.001 |
| Reoperation, n (%)      | 131 (22.7) | 185 (3.4)   | <0.001 |
| 30-Day mortality, n (%) | 30 (4.6)   | 52 (0.9)    | <0.001 |

194 ASA, American Society of Anesthesiology; BMI, body mass index; LOS, length  
 195 of stay; NNIS, National Nosocomial Infections Surveillance; SD, standard  
 196 deviation; SSI, surgical site infection. \* Kruksal-Wallis test  
 197  
 198

199 **Table 2.** Univariate and multivariate analysis of patient and procedure  
 200 dependent risk factors for SSI.  
 201

| Variable                                | SSI        | No SSI      | UV     |        | MV*           |
|-----------------------------------------|------------|-------------|--------|--------|---------------|
|                                         | (n = 619)  | (n = 5902)  | p      | p      | OR (95 CI)    |
| Age higher 65 years, n (%)              | 288 (46.5) | 2108 (35.7) | <0.001 | 0.921  | 1.0 (0.7-1.2) |
| BMI higher 30 kg/m <sup>2</sup> , n (%) | 169 (27.8) | 1313 (22.7) | 0.004  | <0.001 | 1.8 (1.3-2.3) |
| Male sex, n (%)                         | 381 (61.6) | 3332 (56.5) | 0.015  | 0.290  | 1.1 (0.8-1.4) |
| Comorbidities, n (%)                    |            |             |        |        |               |
| Cancer                                  | 310 (50.6) | 1695 (29.1) | <0.001 | 0.018  | 1.3 (1.0-1.8) |
| Liver cirrhosis                         | 20 (3.7)   | 123 (2.3)   | 0.043  | 0.650  | 0.8 (0.4-1.6) |
| Diabetes                                | 86 (13.9)  | 617 (10.5)  | 0.009  | 0.85   | 1.0 (0.7-1.4) |
| Immunosuppression                       | 46 (7.9)   | 372 (6.5)   | 0.214  |        |               |
| Chemotherapy                            | 31 (5.0)   | 159 (2.7)   | 0.001  | 0.87   | 0.9 (0.5-1.7) |
| Alcohol abuse                           | 65 (11.5)  | 394 (7.2)   | <0.001 | 0.38   | 1.2 (0.8-1.7) |
| Smoking                                 | 171 (27.9) | 1509 (26.4) | 0.398  |        |               |
| Malnutrition                            | 116 (20.1) | 472 (8.8)   | <0.001 | <0.001 | 2.5 (1.8-3.4) |

Perioperative Factors, n (%)

|                                            |            |             |        |        |               |
|--------------------------------------------|------------|-------------|--------|--------|---------------|
| Laparotomy                                 | 364 (60.1) | 2625 (45.1) | <0.001 | 0.014  | 1.3 (1.0-1.7) |
| Previous Laparotomy                        | 286 (49.2) | 2129 (38.6) | <0.001 | 0.007  | 1.4 (1.1-1.7) |
| Emergency                                  | 196 (31.7) | 1919 (32.5) | 0.667  |        |               |
| Blood Transfusion                          | 82 (17.3)  | 250 (6.5)   | <0.001 | 0.003  | 1.7 (1.2-2.4) |
| NNIS duration >75 <sup>th</sup> percentile | 331 (53.6) | 1520 (25.9) | <0.001 | <0.001 | 2.3 (1.8-2.9) |
| NNIS contamination level ≥ 3               | 189 (31.1) | 1104 (19.1) | <0.001 | 0.045  | 1.3 (1.0-1.6) |
| NNIS ASA ≥ 3                               | 320 (52.0) | 2007 (34.4) | <0.001 | 0.24   | 1.1 (0.9-1.5) |

202 \*Logistic regression multivariate analysis included all variables with  $p < 0.050$   
 203 in univariate analysis. ASA, American Society of Anesthesiology; BMI, body  
 204 mass index; NNIS, National Nosocomial Infections Surveillance; SSI, surgical  
 205 site infection.

206

207 **Figure 1.** Multivariate analysis of factors associated with SSI following  
 208 abdominal surgery in the entire study cohort.

209

210

## 211 Discussion

212 Male sex is controversially discussed as a risk factor for

213 SSI after abdominal surgery. Our study demonstrates no

214 significant correlation between male sex and SSI in abdominal

215 surgery under elimination of multiple relevant confounders.

216 Age older than 65 years, a BMI over 30 kg/m<sup>2</sup>, an ASA score

217 over 2 as well as a NNIS index over 2 correlated significantly  
218 with risk of SSI.

219 In contrast to our study, several high volume studies  
220 postulate higher risk of SSI for male compared to female  
221 patients after abdominal surgery. [11-15] However, the data  
222 were either presented completely unadjusted for potential  
223 confounders or some important confounders and comorbidities,  
224 as duration of surgery, obesity, malnutrition, were not be  
225 included into the analysis. [11-15] In particular, two studies  
226 demonstrating higher risk for SSI for men either displaying  
227 unadjusted results [11] or potential confounding through  
228 comorbidities as obesity, malnutrition as well as wound  
229 contamination could not be excluded. [12] Similarly male sex  
230 was identified as independent risk factor for SSI after gastric  
231 and pancreatic surgery, however factors as obesity and  
232 malnutrition [14] or wound contamination level [13] were  
233 omitted in multivariate analysis. A study addressing the risk of



234 SSI after cholecystectomy, reporting significantly increased  
235 risk of SSI for male patients, omitted potential important risk  
236 factors as duration of surgery or wound contamination level in  
237 the multivariate analysis.[15] The study further demonstrated  
238 increased rate of severe biliary disease for men. A possible  
239 residual confounding caused by incomplete capture of the  
240 increased rate of severe biliary disease in men using claims data  
241 is discussed in the study. [13, 15]

242 The studies discussed different potential causes for the  
243 higher rate of SSI in men. [11-13] Higher rate of visceral fat in  
244 men may cause higher complexity of surgery and offer optimal  
245 conditions for bacterial growth. [12, 13, 23] Further hormonal  
246 or evolutionary causes were postulated. [11, 12] However, in all  
247 of the named studies at least one potential important risk factor  
248 for SSI as malnutrition, obesity, duration of surgery or wound  
249 contamination level was omitted. [11-15] The potential impact  
250 of the missing patient as well as surgery-related confounders on

251 the postulated higher risk of SSI in these studies therefore  
252 remains unknown. [11-15]

253 In the present study we demonstrate obesity, malnutrition,  
254 cancer, perioperative blood transfusion, long duration of  
255 surgery, high contamination level, laparotomy and previous  
256 surgery as independent significant risk factors for SSI. All of  
257 the named factors are widely-established and show the  
258 comparability of our treated patients to other centers. The  
259 association of obesity and surgical site infection was shown in  
260 several studies, the causality seems multifactorial. [24] It is  
261 well-known that malnutrition comes along with immune  
262 dysfunction, impaired wound-healing and SSI. [25-28]  
263 Increased risk of SSI for patients with cancer may likely be  
264 explained due to immunosuppressive state caused by the  
265 oncological disease as well as its treatment. [29, 30] The  
266 association of long duration of surgery > 75<sup>th</sup> percentile with  
267 SSI is consistent with the finding of multiple studies. The effect

268 may be caused by different factors including association with  
269 more complex surgery and increased fatigue of the surgical  
270 team leading to more technical mistakes. [7, 30, 31] Higher risk  
271 of SSI for patients with contaminated or dirty wound levels is  
272 commonly known. [32] The significant correlation of blood  
273 transfusion with risk of SSI is consistent to several studies. [33-  
274 36] On one hand need of blood transfusion indicates complex  
275 or maybe even uncontrolled intraoperative situation on the  
276 other hand immunosuppressive effects of blood transfusions are  
277 known. [34, 37] Higher rates of SSI for patients with open  
278 surgical approach as well as previous laparotomy are likely  
279 explained due to association with increased surgical difficulty,  
280 more extended surgeries and higher risk of organ lesion. [31,  
281 38-41]

282 Despite the prospective collection of the data, this study is  
283 limited by the retrospective design and therefore was not able  
284 to collect all potential sex-associated factors. Therefore, an

285 effect caused by absence of potential further confounders  
286 cannot be excluded. Because of the same reasons, aspects of  
287 gender were not included in this study. However, the most  
288 relevant strength of the present study is the assessment of a wide  
289 variety of potential risk factors, including all of the most  
290 commonly established risk factors for development of SSI  
291 allowing even multivariate analysis.

292

## 293 **Conclusion**

294 After adjustment for wide variety of potential confounders  
295 including patient-related and procedure-related factors we  
296 could not correlate sex with rate of SSI. However,  $BMI \geq 30$   
297  $kg/m^2$ , duration of surgery  $> 75^{th}$  percentile, high contamination  
298 level, surgical approach, cancer, blood transfusion and  
299 malnutrition are significant independent risk factors for SSI in  
300 abdominal surgery and should be taken into account to reduce  
301 rate of SSI in abdominal surgery in the future.

302

## 303 **Acknowledgements**

304 None.

305

## 306 **References**

- 307 1. Suetens C, Latour K, Kärki T, Ricchizzi E, Kinross P, Moro ML,  
308 et al. Prevalence of healthcare-associated infections, estimated  
309 incidence and composite antimicrobial resistance index in acute care  
310 hospitals and long-term care facilities: results from two European  
311 point prevalence surveys, 2016 to 2017. *Eurosurveillance* **23**,  
312 1800516, doi:doi:[https://doi.org/10.2807/1560-](https://doi.org/10.2807/1560-7917.ES.2018.23.46.1800516)  
313 [7917.ES.2018.23.46.1800516](https://doi.org/10.2807/1560-7917.ES.2018.23.46.1800516) (2018).
- 314 2. Zarb P, Coignard B, Griskeviciene J, Muller A, Vankerckhoven  
315 V, Weist K, et al. The European Centre for Disease Prevention and  
316 Control (ECDC) pilot point prevalence survey of healthcare-  
317 associated infections and antimicrobial use. *Euro surveillance :*  
318 *bulletin Europeen sur les maladies transmissibles = European*  
319 *communicable disease bulletin* **17**, doi:10.2807/ese.17.46.20316-en  
320 (2012).
- 321 3. Jenks PJ, Laurent M, McQuarry S, Watkins R. Clinical and  
322 economic burden of surgical site infection (SSI) and predicted  
323 financial consequences of elimination of SSI from an English hospital.  
324 *The Journal of hospital infection* **86**, 24-33,  
325 doi:10.1016/j.jhin.2013.09.012 (2014).
- 326 4. Badia JM, Casey AL, Petrosillo N, Hudson PM, Mitchell SA,  
327 Crosby C. Impact of surgical site infection on healthcare costs and  
328 patient outcomes: a systematic review in six European countries.  
329 *Journal of Hospital Infection* **96**, 1-15,  
330 doi:<https://doi.org/10.1016/j.jhin.2017.03.004> (2017).
- 331 5. Global Guidelines for the Prevention of Surgical Site Infection.  
332 Table 3.1.2, Summary of SSI rates in different countries. (Geneva  
333 2018).

- 334 6. Healthcare-associated infections: surgical site infections. Annual  
335 epidemiological report for 2017. (Stockholm 2019).
- 336 7. Cheng H, Chen BP, Soleas IM, Ferko NC, Cameron CG, Hinoul  
337 P. Prolonged Operative Duration Increases Risk of Surgical Site  
338 Infections: A Systematic Review. *Surgical infections* **18**, 722-35,  
339 doi:10.1089/sur.2017.089 (2017).
- 340 8. Gibbons C, Bruce J, Carpenter J, Wilson AP, Wilson J, Pearson  
341 A, et al. Identification of risk factors by systematic review and  
342 development of risk-adjusted models for surgical site infection. *Health  
343 technology assessment (Winchester, England)* **15**, 1-156, iii-iv,  
344 doi:10.3310/hta15300 (2011).
- 345 9. Korol E, Johnston K, Waser N, Sifakis F, Jafri HS, Lo M, et al.  
346 A Systematic Review of Risk Factors Associated with Surgical Site  
347 Infections among Surgical Patients. *PloS one* **8**, e83743,  
348 doi:10.1371/journal.pone.0083743 (2013).
- 349 10. Winfield RD, Reese S, Bochicchio K, Mazuski JE, Bochicchio  
350 GV. Obesity and the Risk for Surgical Site Infection in Abdominal  
351 Surgery. *Am Surg* **82**, 331-6 (2016).
- 352 11. Langelotz C, Mueller-Rau C, Terziyski S, Rau B, Krannich A,  
353 Gastmeier P, et al. Gender-Specific Differences in Surgical Site  
354 Infections: An Analysis of 438,050 Surgical Procedures from the  
355 German National Nosocomial Infections Surveillance System.  
356 *Viszeralmedizin* **30**, 114-7, doi:10.1159/000362100 (2014).
- 357 12. Aghdassi SJS, Schröder C, Gastmeier P. Gender-related risk  
358 factors for surgical site infections. Results from 10 years of  
359 surveillance in Germany. *Antimicrobial Resistance & Infection  
360 Control* **8**, 95, doi:10.1186/s13756-019-0547-x (2019).
- 361 13. Mazmudar A, Vitello D, Chapman M, Tomlinson JS, Bentrem  
362 DJ. Gender as a risk factor for adverse intraoperative and  
363 postoperative outcomes of elective pancreatectomy. *Journal of  
364 surgical oncology* **115**, 131-6, doi:https://doi.org/10.1002/jso.24488  
365 (2017).
- 366 14. Kim ES, Kim HB, Song K-H, Kim YK, Kim H-H, Jin HY, et al.  
367 Prospective Nationwide Surveillance of Surgical Site Infections after  
368 Gastric Surgery and Risk Factor Analysis in the Korean Nosocomial  
369 Infections Surveillance System (KONIS). *Infection Control &  
370 Hospital Epidemiology* **33**, 572-80, doi:10.1086/665728 (2015).

- 371 15. Warren DK, Nickel KB, Wallace AE, Mines D, Tian F, Symons  
372 WJ, et al. Risk Factors for Surgical Site Infection After  
373 Cholecystectomy. *Open Forum Infectious Diseases* **4**,  
374 doi:10.1093/ofid/ofx036 (2017).
- 375 16. Tschan F, Keller S, Semmer NK, Timm-Holzer E, Zimmermann  
376 J, Huber SA, et al. Effects of structured intraoperative briefings on  
377 patient outcomes: multicentre before-and-after study. *The British*  
378 *journal of surgery* **109**, 136-44, doi:10.1093/bjs/znab384 (2021).
- 379 17. Anesthesiologists ASo. ASA Physical Status Classification  
380 System  
381 American Society of Anesthesiologists; [updated  
382 13.12.202005.05.2021]. Available from:  
383 [https://www.asahq.org/standards-and-guidelines/asa-physical-status-](https://www.asahq.org/standards-and-guidelines/asa-physical-status-classification-system)  
384 [classification-system](https://www.asahq.org/standards-and-guidelines/asa-physical-status-classification-system).
- 385 18. Horan TC, Andrus M, Dudeck MA. CDC/NHSN surveillance  
386 definition of health care-associated infection and criteria for specific  
387 types of infections in the acute care setting. *Am J Infect Control* **36**,  
388 309-32, doi:10.1016/j.ajic.2008.03.002 (2008).
- 389 19. Kuster SP, Eisenring M-C, Sax H, Troillet N. Structure, Process,  
390 and Outcome Quality of Surgical Site Infection Surveillance in  
391 Switzerland. *Infection Control & Hospital Epidemiology* **38**, 1172-81,  
392 doi:10.1017/ice.2017.169 (2017).
- 393 20. Emori TG, Culver DH, Horan TC, Jarvis WR, White JW, Olson  
394 DR, et al. National nosocomial infections surveillance system (NNIS):  
395 description of surveillance methods. *Am J Infect Control* **19**, 19-35,  
396 doi:10.1016/0196-6553(91)90157-8 (1991).
- 397 21. Keller S, Grass F, Tschan F, Addor V, Petignat C, Moulin E, et  
398 al. Comparison of Surveillance of Surgical Site Infections by a  
399 National Surveillance Program and by Institutional Audit. *Surgical*  
400 *infections* **20**, 225-30, doi:10.1089/sur.2018.211 (2019).
- 401 22. Culver DH, Horan TC, Gaynes RP, Martone WJ, Jarvis WR,  
402 Emori TG, et al. Surgical wound infection rates by wound class,  
403 operative procedure, and patient risk index. National Nosocomial  
404 Infections Surveillance System. *Am J Med* **91**, 152s-7s,  
405 doi:10.1016/0002-9343(91)90361-z (1991).
- 406 23. Wajchenberg BL. Subcutaneous and visceral adipose tissue:  
407 their relation to the metabolic syndrome. *Endocr Rev* **21**, 697-738,  
408 doi:10.1210/edrv.21.6.0415 (2000).

- 409 24. Thelwall S, Harrington P, Sheridan E, Lamagni T. Impact of  
410 obesity on the risk of wound infection following surgery: results from  
411 a nationwide prospective multicentre cohort study in England. *Clin*  
412 *Microbiol Infect* **21**, 1008.e1-8, doi:10.1016/j.cmi.2015.07.003 (2015).
- 413 25. Bourke CD, Berkley JA, Prendergast AJ. Immune Dysfunction  
414 as a Cause and Consequence of Malnutrition. *Trends Immunol* **37**,  
415 386-98, doi:10.1016/j.it.2016.04.003 (2016).
- 416 26. Skeie E, Koch AM, Harthug S, Fosse U, Sygnestveit K, Nilsen  
417 RM, et al. A positive association between nutritional risk and the  
418 incidence of surgical site infections: A hospital-based register study.  
419 *PloS one* **13**, e0197344-e, doi:10.1371/journal.pone.0197344 (2018).
- 420 27. Hennessey DB, Burke JP, Ni-Dhonochu T, Shields C, Winter  
421 DC, Mealy K. Preoperative hypoalbuminemia is an independent risk  
422 factor for the development of surgical site infection following  
423 gastrointestinal surgery: a multi-institutional study. *Annals of surgery*  
424 **252**, 325-9, doi:10.1097/SLA.0b013e3181e9819a (2010).
- 425 28. Stechmiller JK. Understanding the Role of Nutrition and Wound  
426 Healing. *Nutrition in Clinical Practice* **25**, 61-8,  
427 doi:<https://doi.org/10.1177/0884533609358997> (2010).
- 428 29. Payne WG, Naidu DK, Wheeler CK, Barkoe D, Mentis M, Salas  
429 RE, et al. Wound healing in patients with cancer. *Eplasty* **8**, e9-e  
430 (2008).
- 431 30. Cheng K, Li J, Kong Q, Wang C, Ye N, Xia G. Risk factors for  
432 surgical site infection in a teaching hospital: a prospective study of  
433 1,138 patients. *Patient Prefer Adherence* **9**, 1171-7,  
434 doi:10.2147/ppa.S86153 (2015).
- 435 31. Kurmann A, Vorburger SA, Candinas D, Beldi G. Operation  
436 time and body mass index are significant risk factors for surgical site  
437 infection in laparoscopic sigmoid resection: a multicenter study.  
438 *Surgical endoscopy* **25**, 3531-4, doi:10.1007/s00464-011-1753-7  
439 (2011).
- 440 32. Ortega G, Rhee DS, Papandria DJ, Yang J, Ibrahim AM, Shore  
441 AD, et al. An evaluation of surgical site infections by wound  
442 classification system using the ACS-NSQIP. *The Journal of surgical*  
443 *research* **174**, 33-8, doi:10.1016/j.jss.2011.05.056 (2012).
- 444 33. Higgins RM, Helm MC, Kindel TL, Gould JC. Perioperative  
445 blood transfusion increases risk of surgical site infection after bariatric



- 446 surgery. *Surg Obes Relat Dis* **15**, 582-7,  
447 doi:10.1016/j.soard.2019.01.023 (2019).
- 448 34. Fawley J, Chelius TH, Arca MJ. Relationship between  
449 perioperative blood transfusion and surgical site infections in pediatric  
450 general and thoracic surgical patients. *J Pediatr Surg* **53**, 1105-10,  
451 doi:10.1016/j.jpedsurg.2018.02.062 (2018).
- 452 35. Helm M, Gould J, Higgins R. A502 - Perioperative Blood  
453 Transfusion Increases Risk of Surgical Site Infection Following  
454 Bariatric Surgery. *Surgery for Obesity and Related Diseases* **13**, S52-  
455 S3, doi:<https://doi.org/10.1016/j.soard.2017.09.116> (2017).
- 456 36. Dosch AR, Grigorian A, Delaplain PT, Bartholomew TS, Won  
457 EJ, Gabriel V, et al. Perioperative blood transfusion is associated with  
458 an increased risk for post-surgical infection following  
459 pancreaticoduodenectomy. *HPB : the official journal of the*  
460 *International Hepato Pancreato Biliary Association* **21**, 1577-84,  
461 doi:10.1016/j.hpb.2019.03.374 (2019).
- 462 37. Youssef LA, Spitalnik SL. Transfusion-related  
463 immunomodulation: a reappraisal. *Curr Opin Hematol* **24**, 551-7,  
464 doi:10.1097/MOH.0000000000000376 (2017).
- 465 38. Alkaaki A, Al-Radi OO, Khoja A, Alnawawi A, Alnawawi A,  
466 Maghrabi A, et al. Surgical site infection following abdominal  
467 surgery: a prospective cohort study. *Can J Surg* **62**, 111-7,  
468 doi:10.1503/cjs.004818 (2019).
- 469 39. Li Z, Li H, Lv P, Peng X, Wu C, Ren J, et al. Prospective  
470 multicenter study on the incidence of surgical site infection after  
471 emergency abdominal surgery in China. *Scientific Reports* **11**, 7794,  
472 doi:10.1038/s41598-021-87392-8 (2021).
- 473 40. Fahrner R, Malinka T, Klasen J, Candinas D, Beldi G.  
474 Additional surgical procedure is a risk factor for surgical site  
475 infections after laparoscopic cholecystectomy. *Langenbeck's archives*  
476 *of surgery* **399**, 595-9, doi:10.1007/s00423-014-1197-3 (2014).
- 477 41. Zwicky SN, Stroka D, Zindel J. Sterile Injury Repair and  
478 Adhesion Formation at Serosal Surfaces. *Frontiers in Immunology* **12**,  
479 doi:10.3389/fimmu.2021.684967 (2021).
- 480

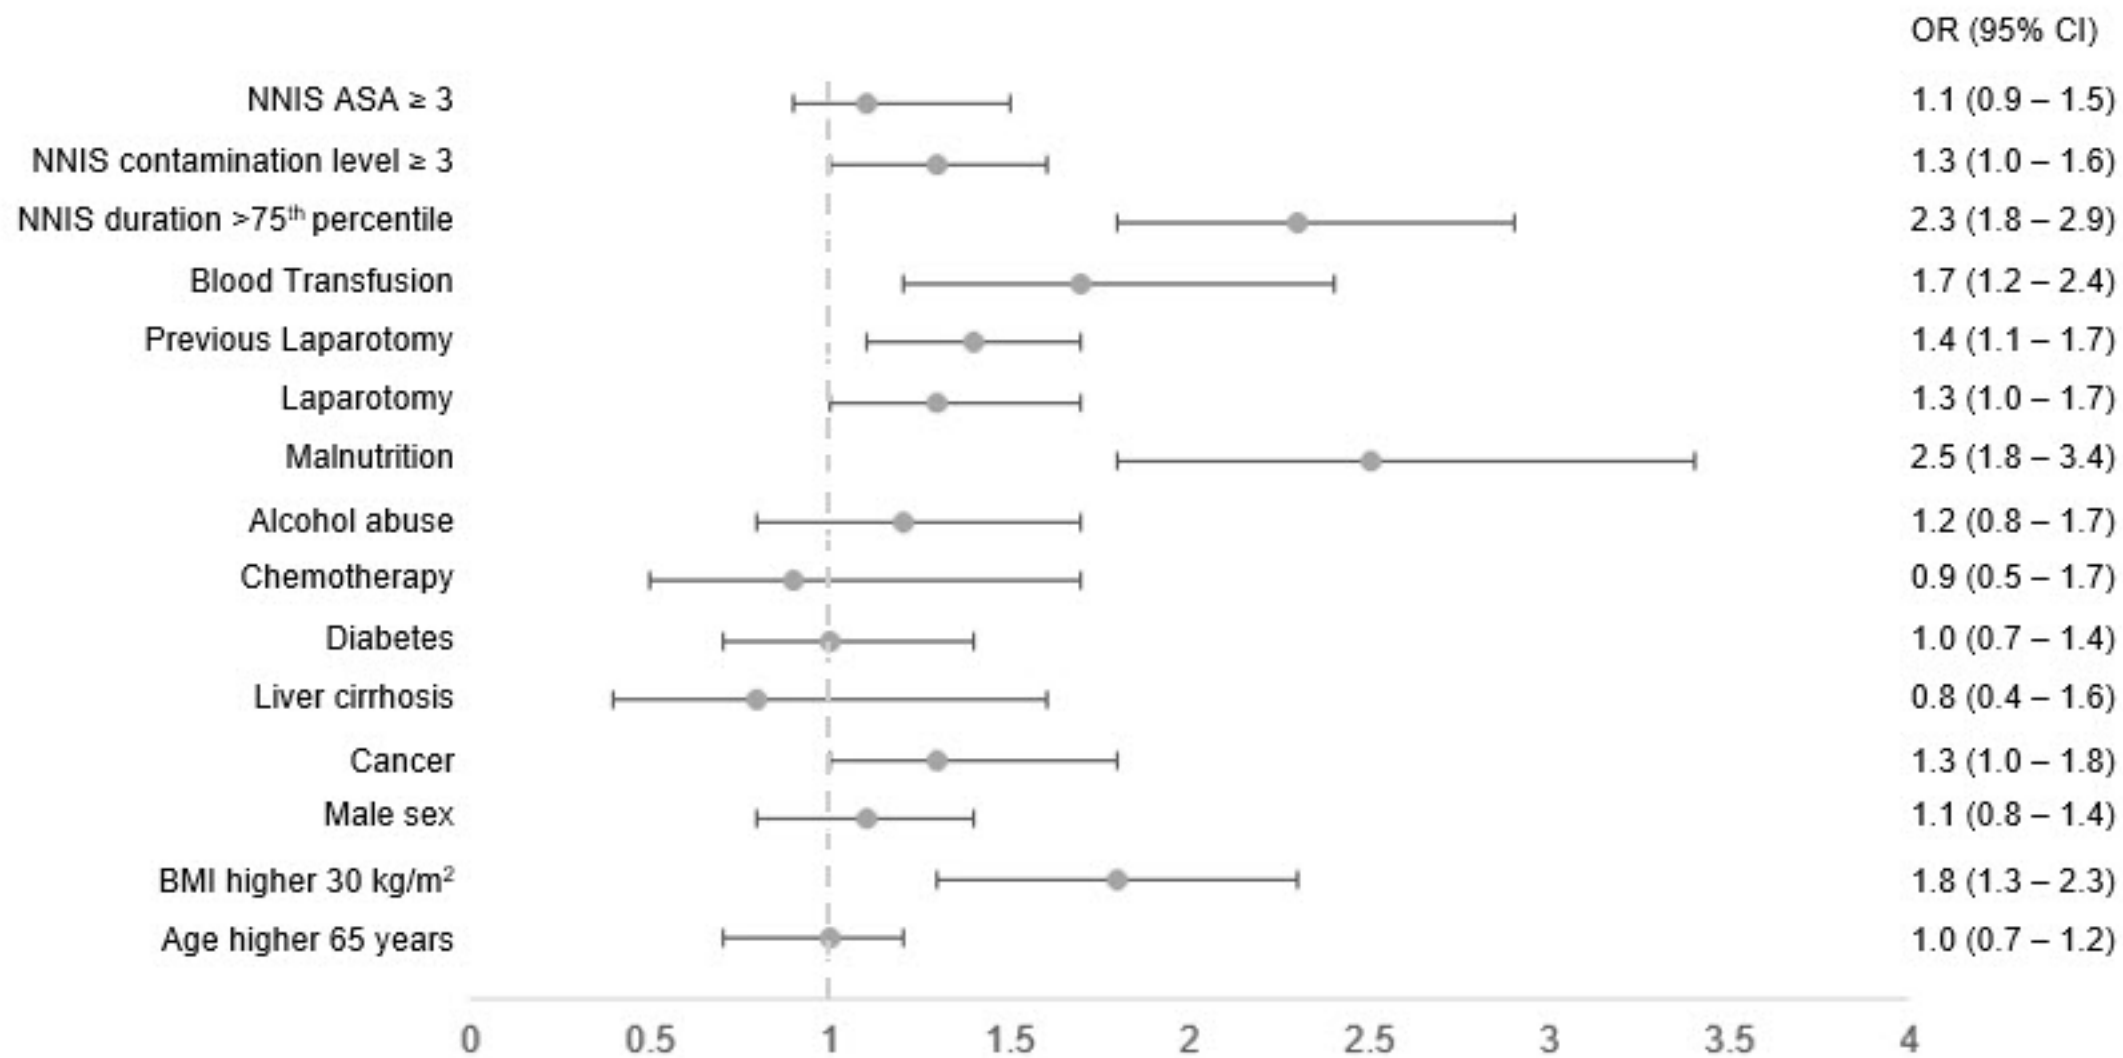

Figure 1
